# Supplementary material for: The Danish cancer pathway for patients with serious non-specific symptoms and signs of cancer–a cross-sectional study of patient characteristics and cancer probability
Source: BMC Cancer. 2015 May 20;15:421. doi: 10.1186/s12885-015-1424-5 (PMC4445271; doi:10.1186/s12885-015-1424-5)
Supplement: Supplementary file 1 — Symptoms and abnormal clinical findings highly predictive of cancer. [file 12885_2015_1424_MOESM1_ESM.pdf]

**Appendix 1.** Symptoms and abnormal clinical findings highly predictive of cancer

|                                      | Total<br>(n=1269) | Patients with cancer<br>n (%) |
|--------------------------------------|-------------------|-------------------------------|
| <b>Symptoms at referral</b>          |                   |                               |
| Feeling of hunger                    | 3 (0.2%)          | 2 (66.7%)                     |
| Paralysis/limb weakness              | 4 (0.3%)          | 2 (50.0%)                     |
| Neurological symptom                 | 18 (1.4%)         | 8 (44.4%)                     |
| Jaundice                             | 14 (1.1%)         | 6 (42.9%)                     |
| Abdominal distension                 | 22 (1.7%)         | 9 (40.9%)                     |
| Dysphagia                            | 30 (2.4%)         | 11 (36.7%)                    |
| Back pain                            | 9 (0.7%)          | 3 (33.3%)                     |
| Tingling fingers/feet/toes           | 6 (0.5%)          | 2 (33.3%)                     |
| Joint symptom                        | 7 (0.6%)          | 2 (28.6%)                     |
| Memory loss                          | 7 (0.6%)          | 2 (28.6%)                     |
| Blood in stool                       | 35 (2.8%)         | 9 (27.7%)                     |
| Lump/tumor                           | 107 (8.4%)        | 29 (27.1%)                    |
| <b>Clinical findings at referral</b> |                   |                               |
| Bone soreness                        | 3 (0.2%)          | 2 (66.7%)                     |
| Cognitive problems                   | 3 (0.2%)          | 2 (66.7%)                     |
| Icterus                              | 10 (0.8%)         | 5 (50.0%)                     |
| Ascites                              | 2 (0.2%)          | 1 (50.0%)                     |
| Abnormal finding in mamma            | 6 (0.5%)          | 2 (33.3%)                     |
| Back pain                            | 6 (0.5%)          | 2 (33.3%)                     |
| Anaemia                              | 3 (0.2%)          | 1 (33.3%)                     |
| Level of conscience                  | 13 (1.0%)         | 4 (30.8%)                     |
| Neurological finding                 | 29 (2.3%)         | 8 (27.6%)                     |
| Abnormal lymph glands                | 43 (3.4%)         | 11 (25.6%)                    |
| GP's gut feeling                     | 287 (22.6%)       | 73 (25.4%)                    |
| Exploratio rectalis                  | 8 (0.6%)          | 2 (25.0%)                     |
